# Supplementary material for: Low-Cost Air Quality Sensor Evaluation and Calibration in Contrasting Aerosol Environments
Source: Research Square preprint supplement (doi:10.21203/rs.3.rs-7601780/v1), 2026-01-28
Supplement: Supplementary file 1 [file 1b4cb8ec90a8b9580be6e448.docx]

**Low-Cost Air Quality Sensor Evaluation and Calibration in Contrasting Aerosol Environments**

Pawan Gupta1, Prakash Doraiswamy2, Alqamah Sayeed3,4, Palak Baliyan5,6, Sagnik Dey5,7, Ryan Chartier2, Robert C. Levy1

1NASA Goddard Space Flight Center, Huntsville, AL, USA.

2RTI International, Research Triangle Park, NC, USA.

3 NASA Marshall Space Flight Center, Huntsville, AL, USA

4The University of Alabama in Huntsville, AL, USA.

5Indian Institute of Technology, New Delhi, India

6Health Effects Institute (HEI), Boston, U.S.A.

7Department of Health, Policy and Management, Korea University, Seoul, South Korea.

*Correspondence to*: Alqamah Sayeed (alqamah.sayeed@nasa.gov)

**Supplementary Material**

**
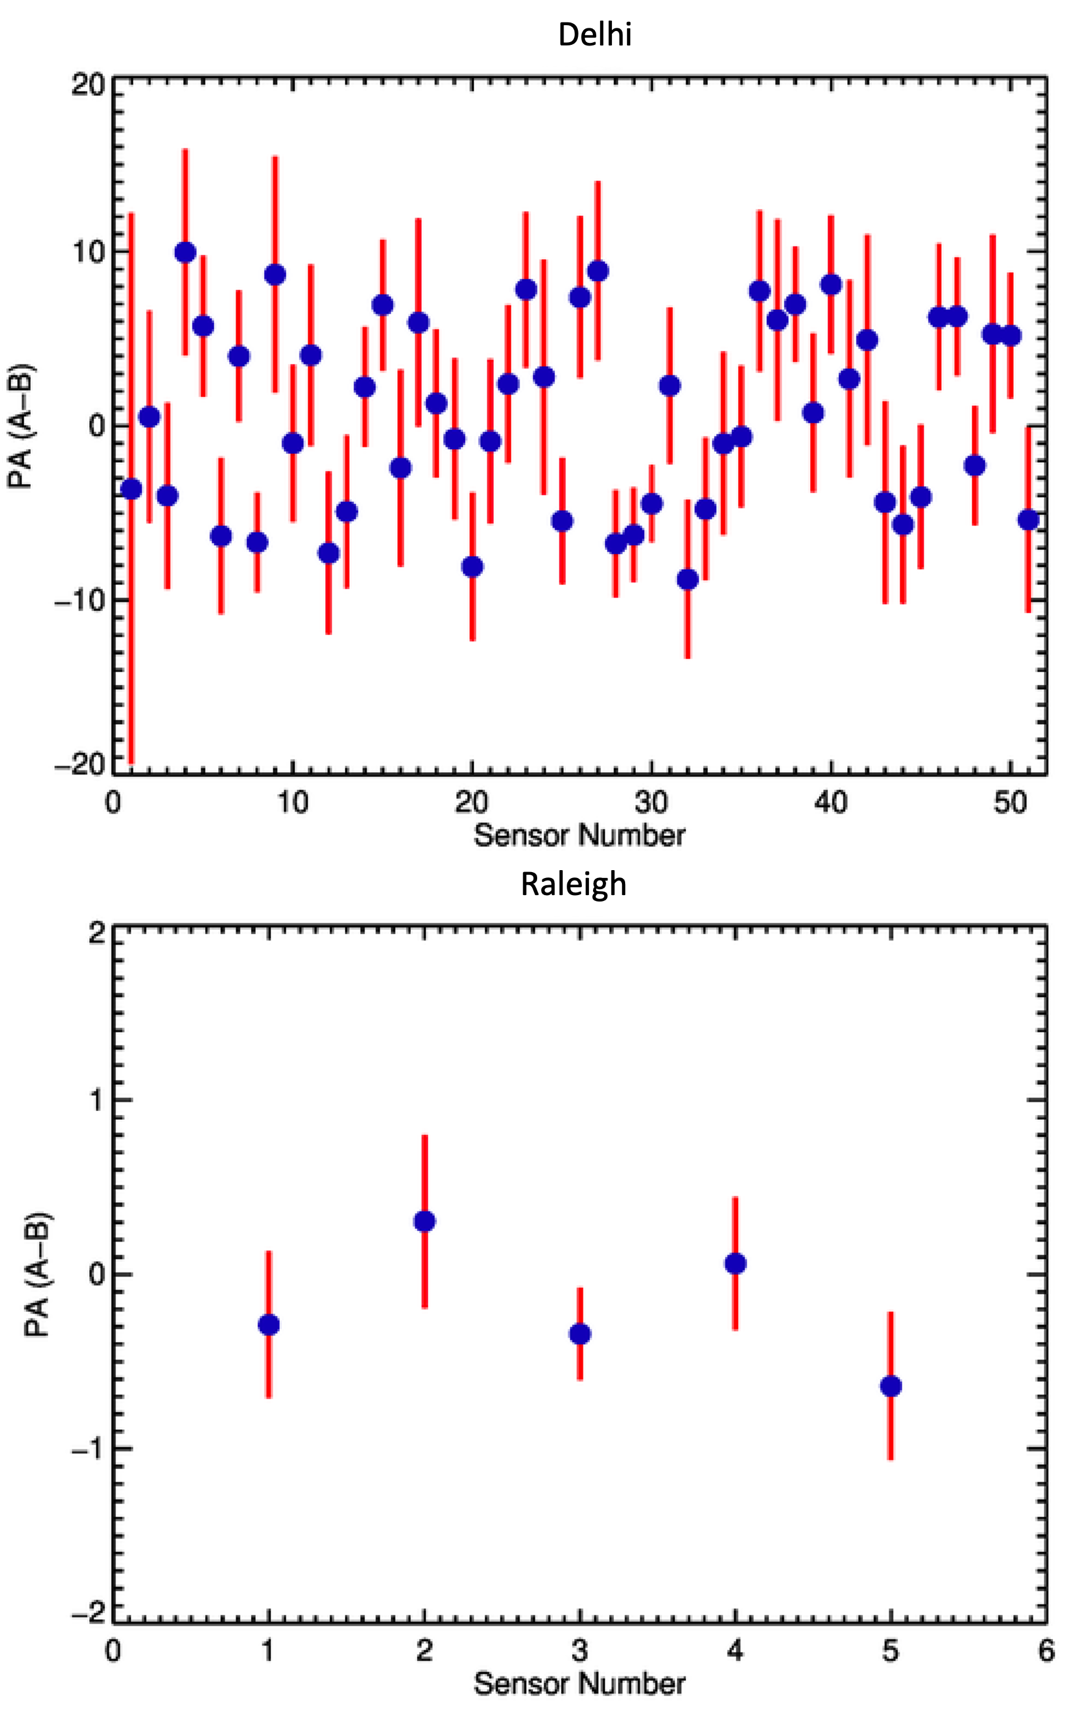
**

**Figure S1. The plots show the mean difference in A & B measurements from each sensor for the two regions. The blue dot represents the mean, and the red vertical line is one standard deviation.**

**
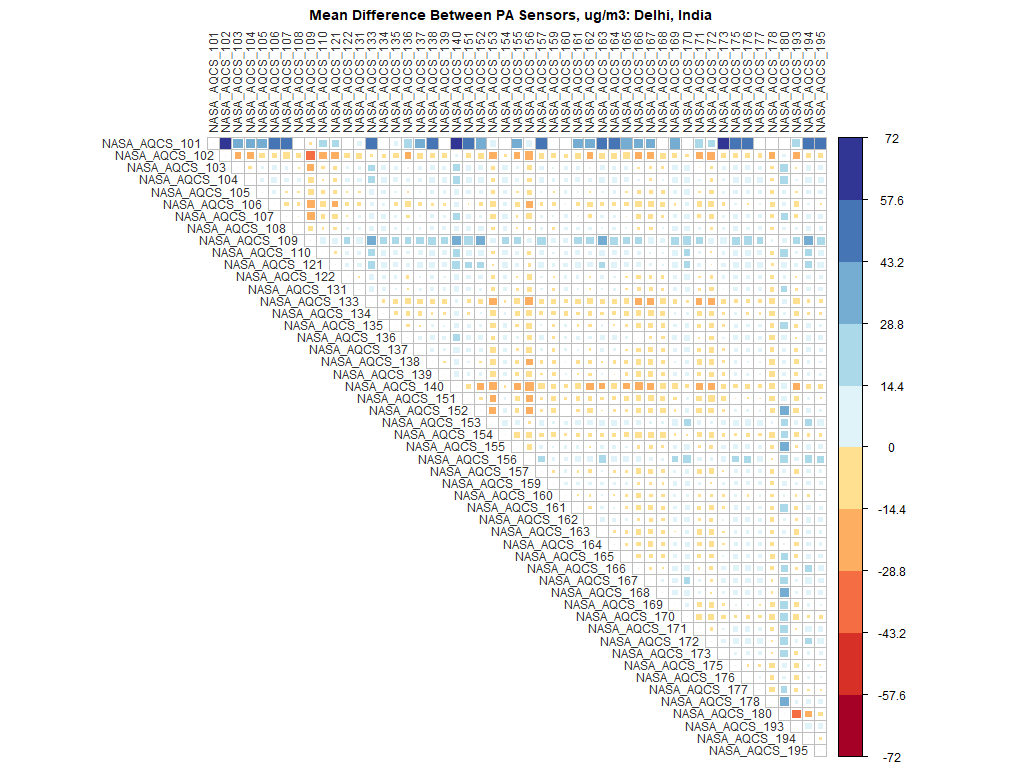
**

**Figure S2.1. Mean Absolute Difference (µgm-3) Between Any Two Sensors in Delhi**

**
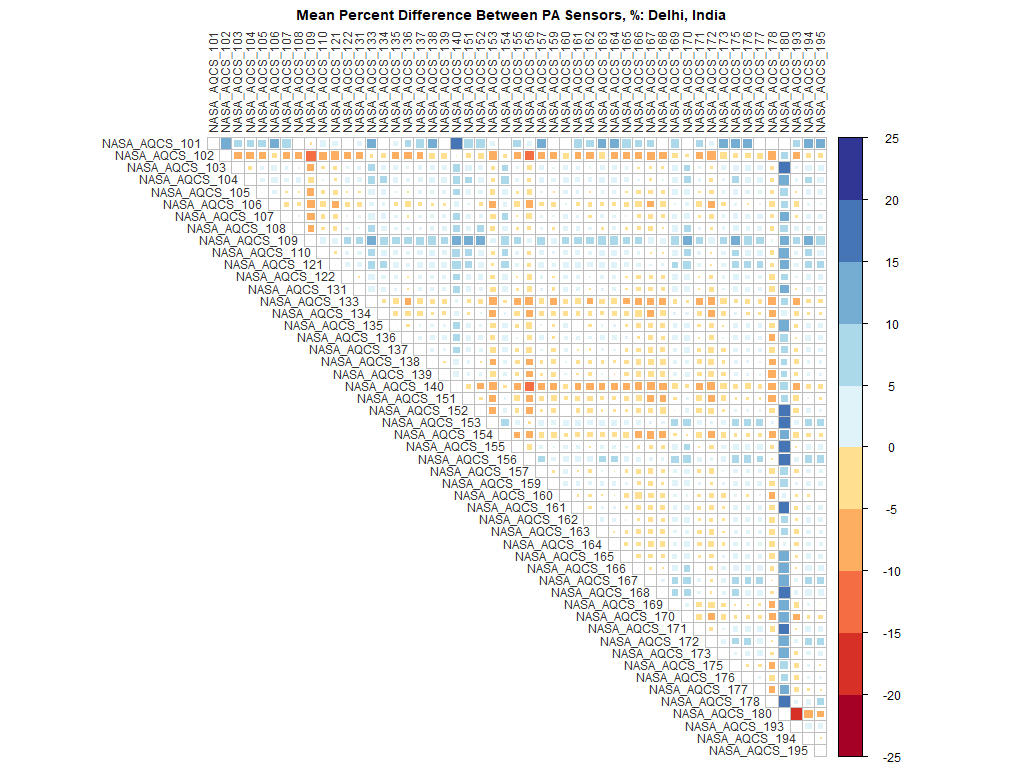
**

**Figure S2.2. Mean Percent (%) Difference Between Any Two Sensors in Delhi**

**
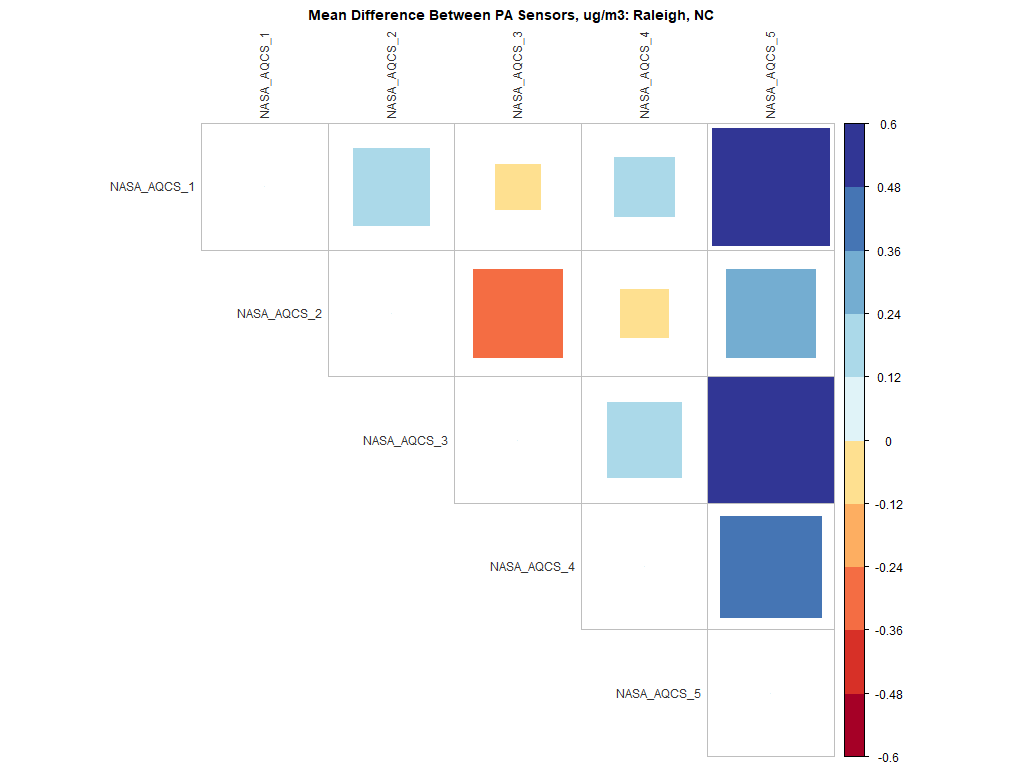
**

**Figure S2.3. Mean Absolute Difference (µgm-3) Between Any Two Sensors in Raleigh**

**
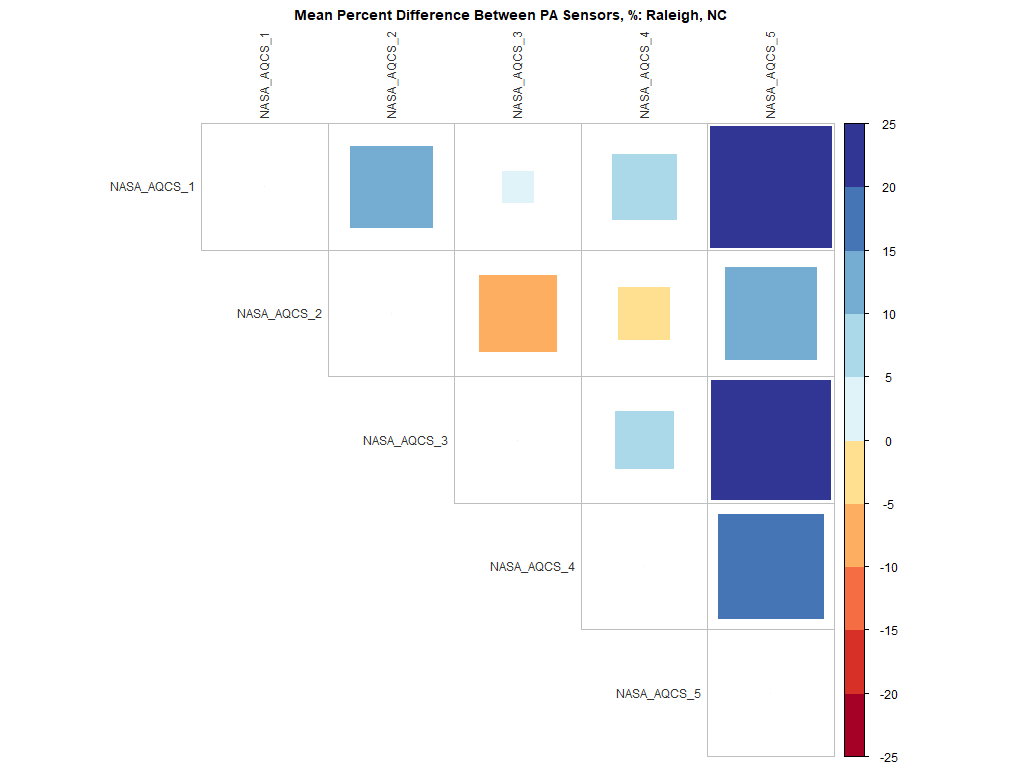
**

**Figure S2.4. Mean Percent (%) Difference Between Any Two Sensors in Raleigh**

**
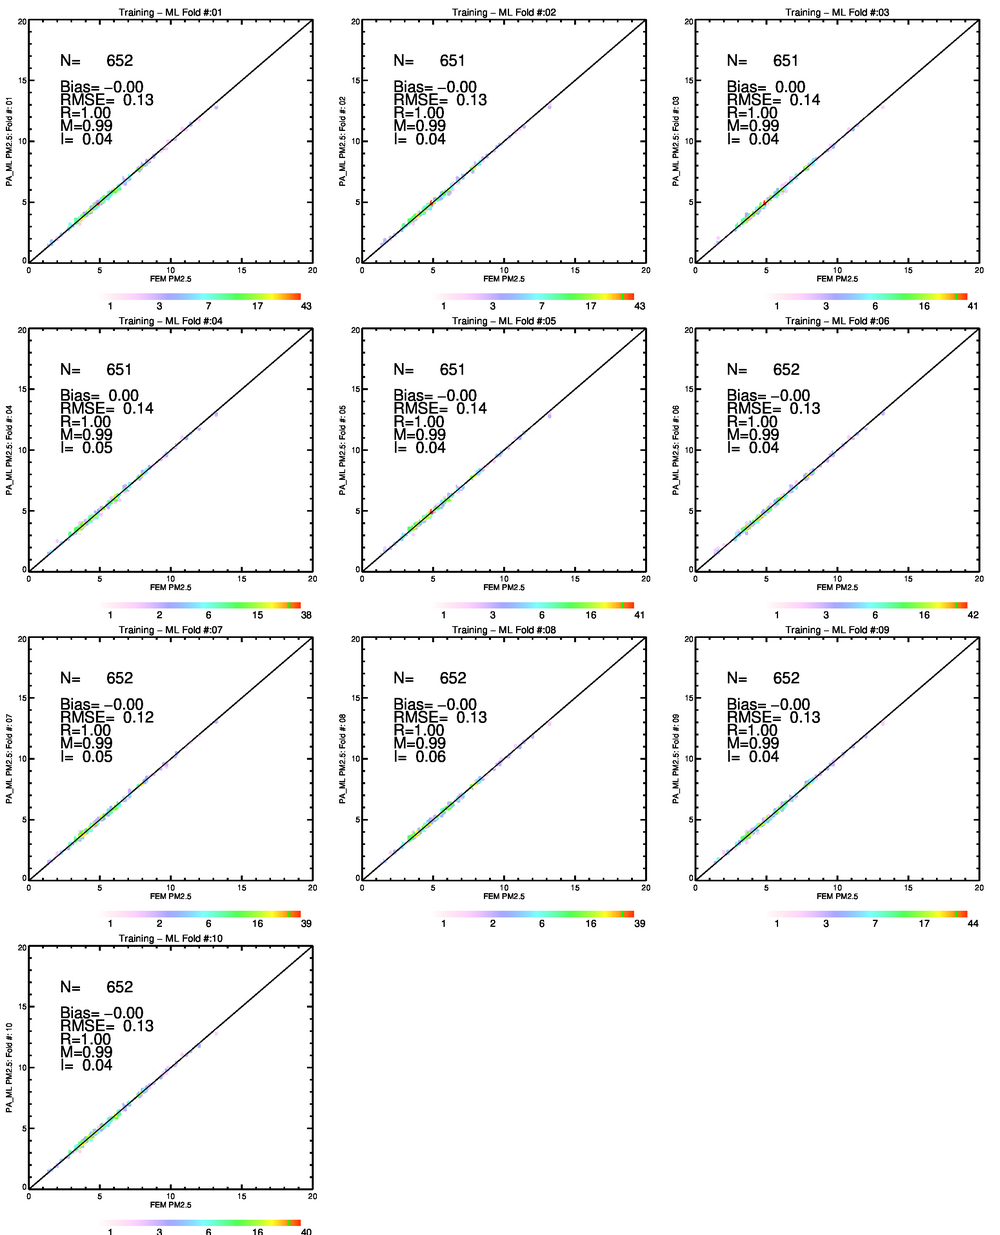
**

**Figure S3.1 – Inter-comparison between FEM and ML output for Raleigh during 10-fold training of MLA. Each density scatter plot represents 1-fold.**

**
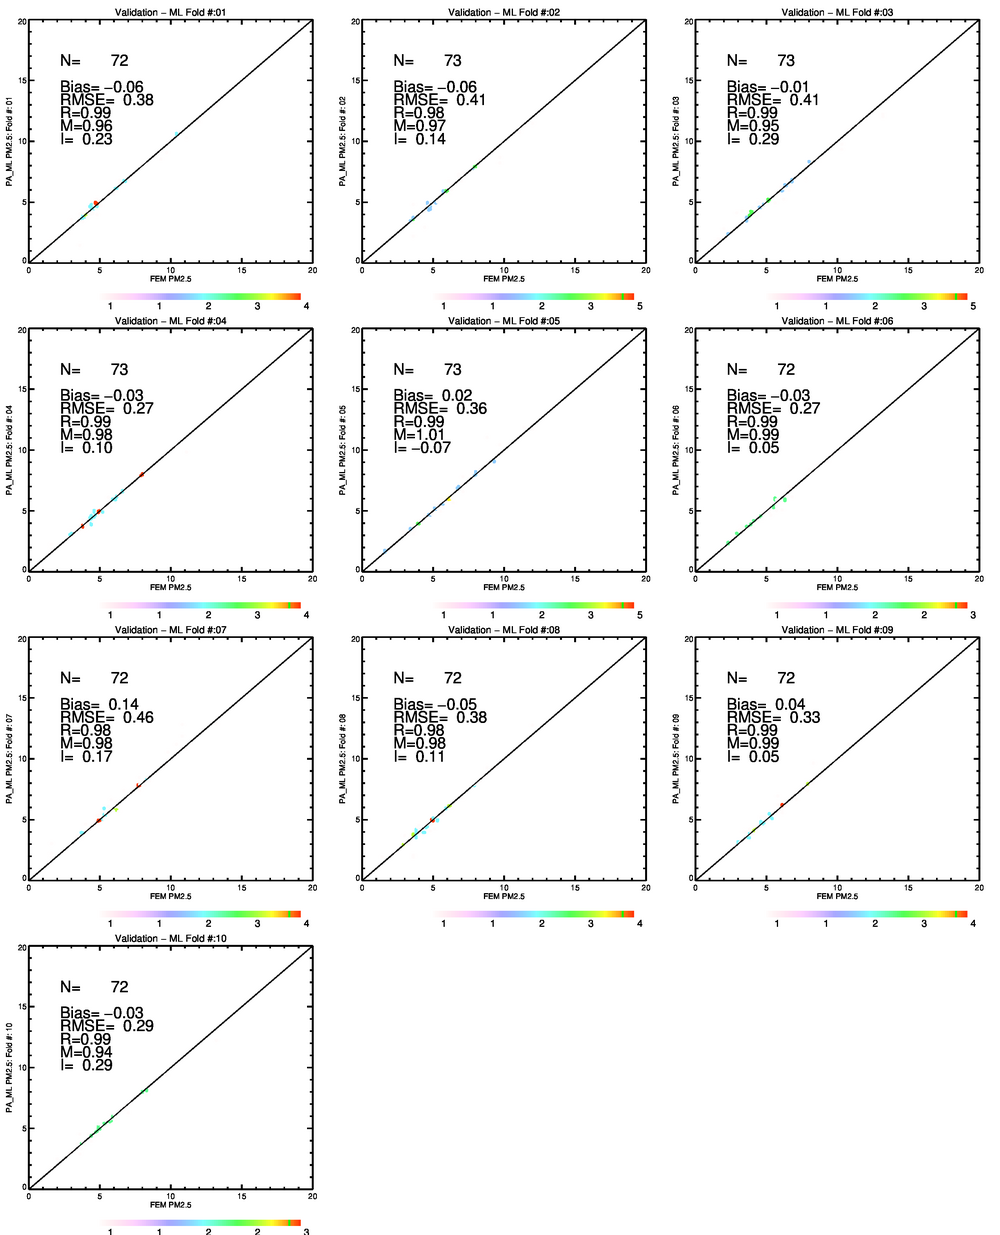
**

**Figure S3.2 – same as Figure S3.1 but for 10-fold validation in Raleigh.**

**
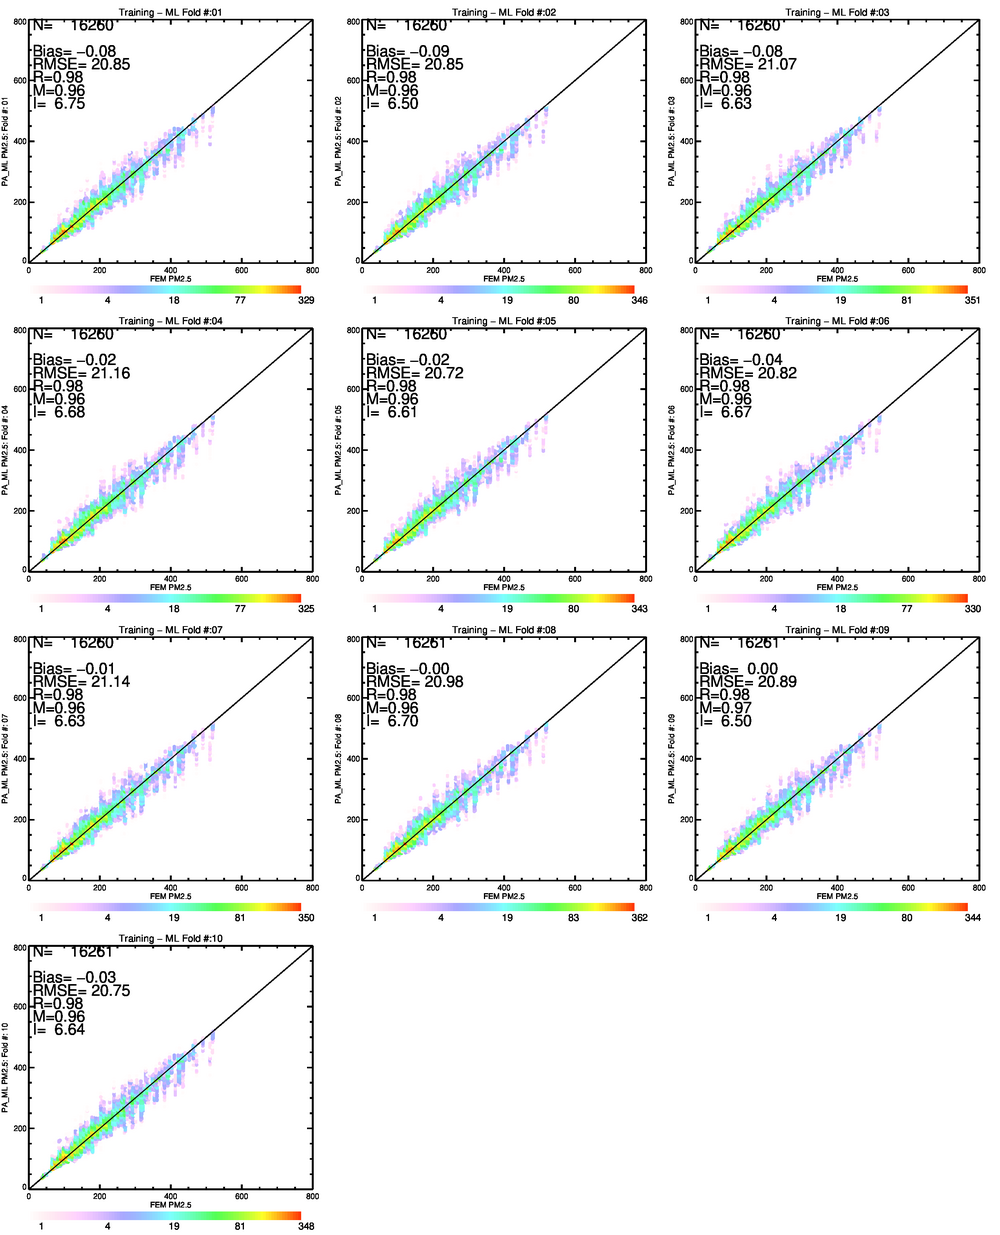
Figure S3.3 – same as Figure S3.1 but for 10-fold training for Delhi.**

**
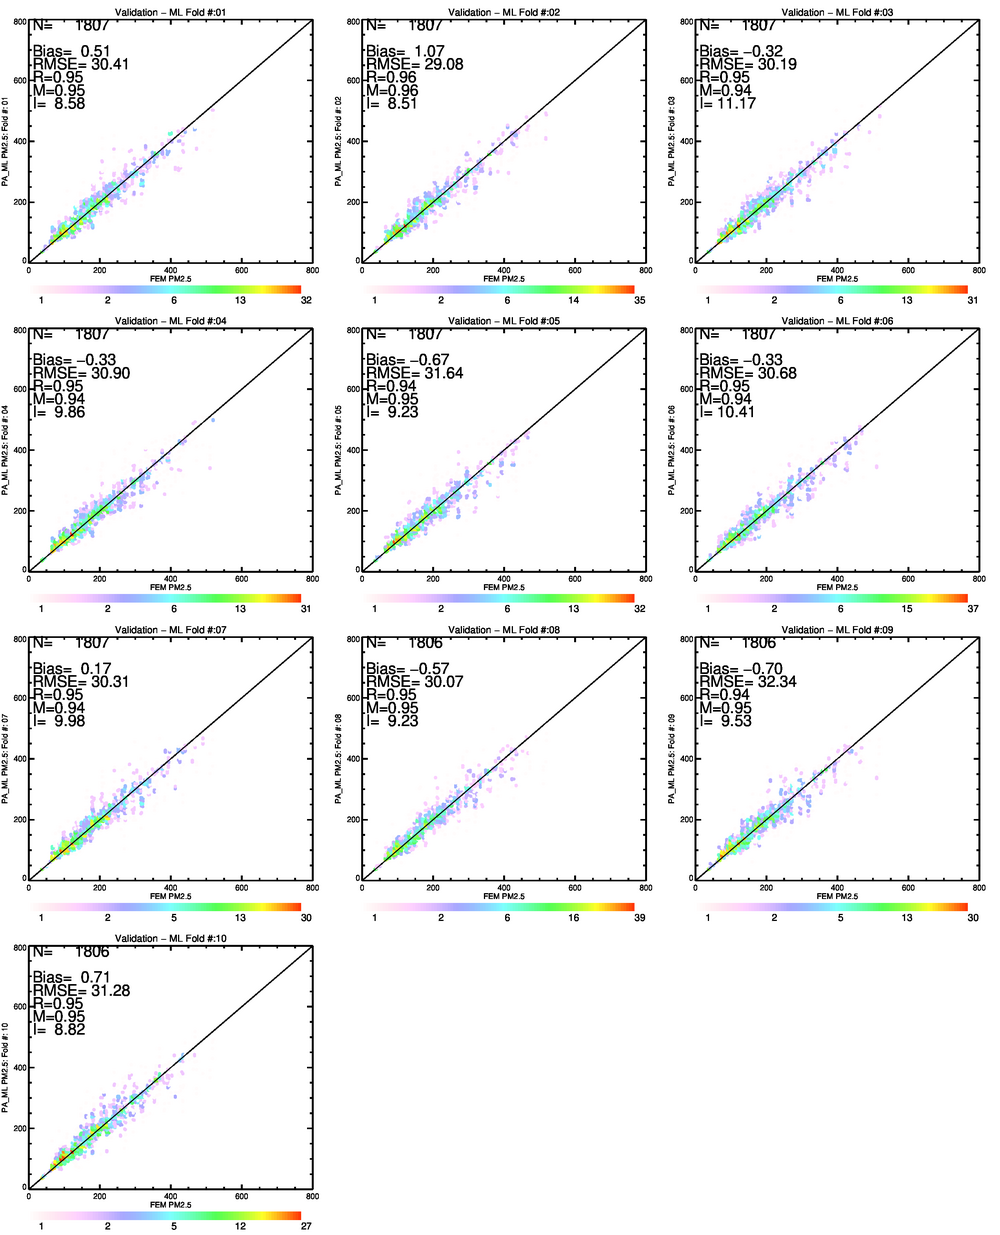
**

**Figure S3.4 – same as Figure S3.1 but for 10-fold validation for Delhi.**

**
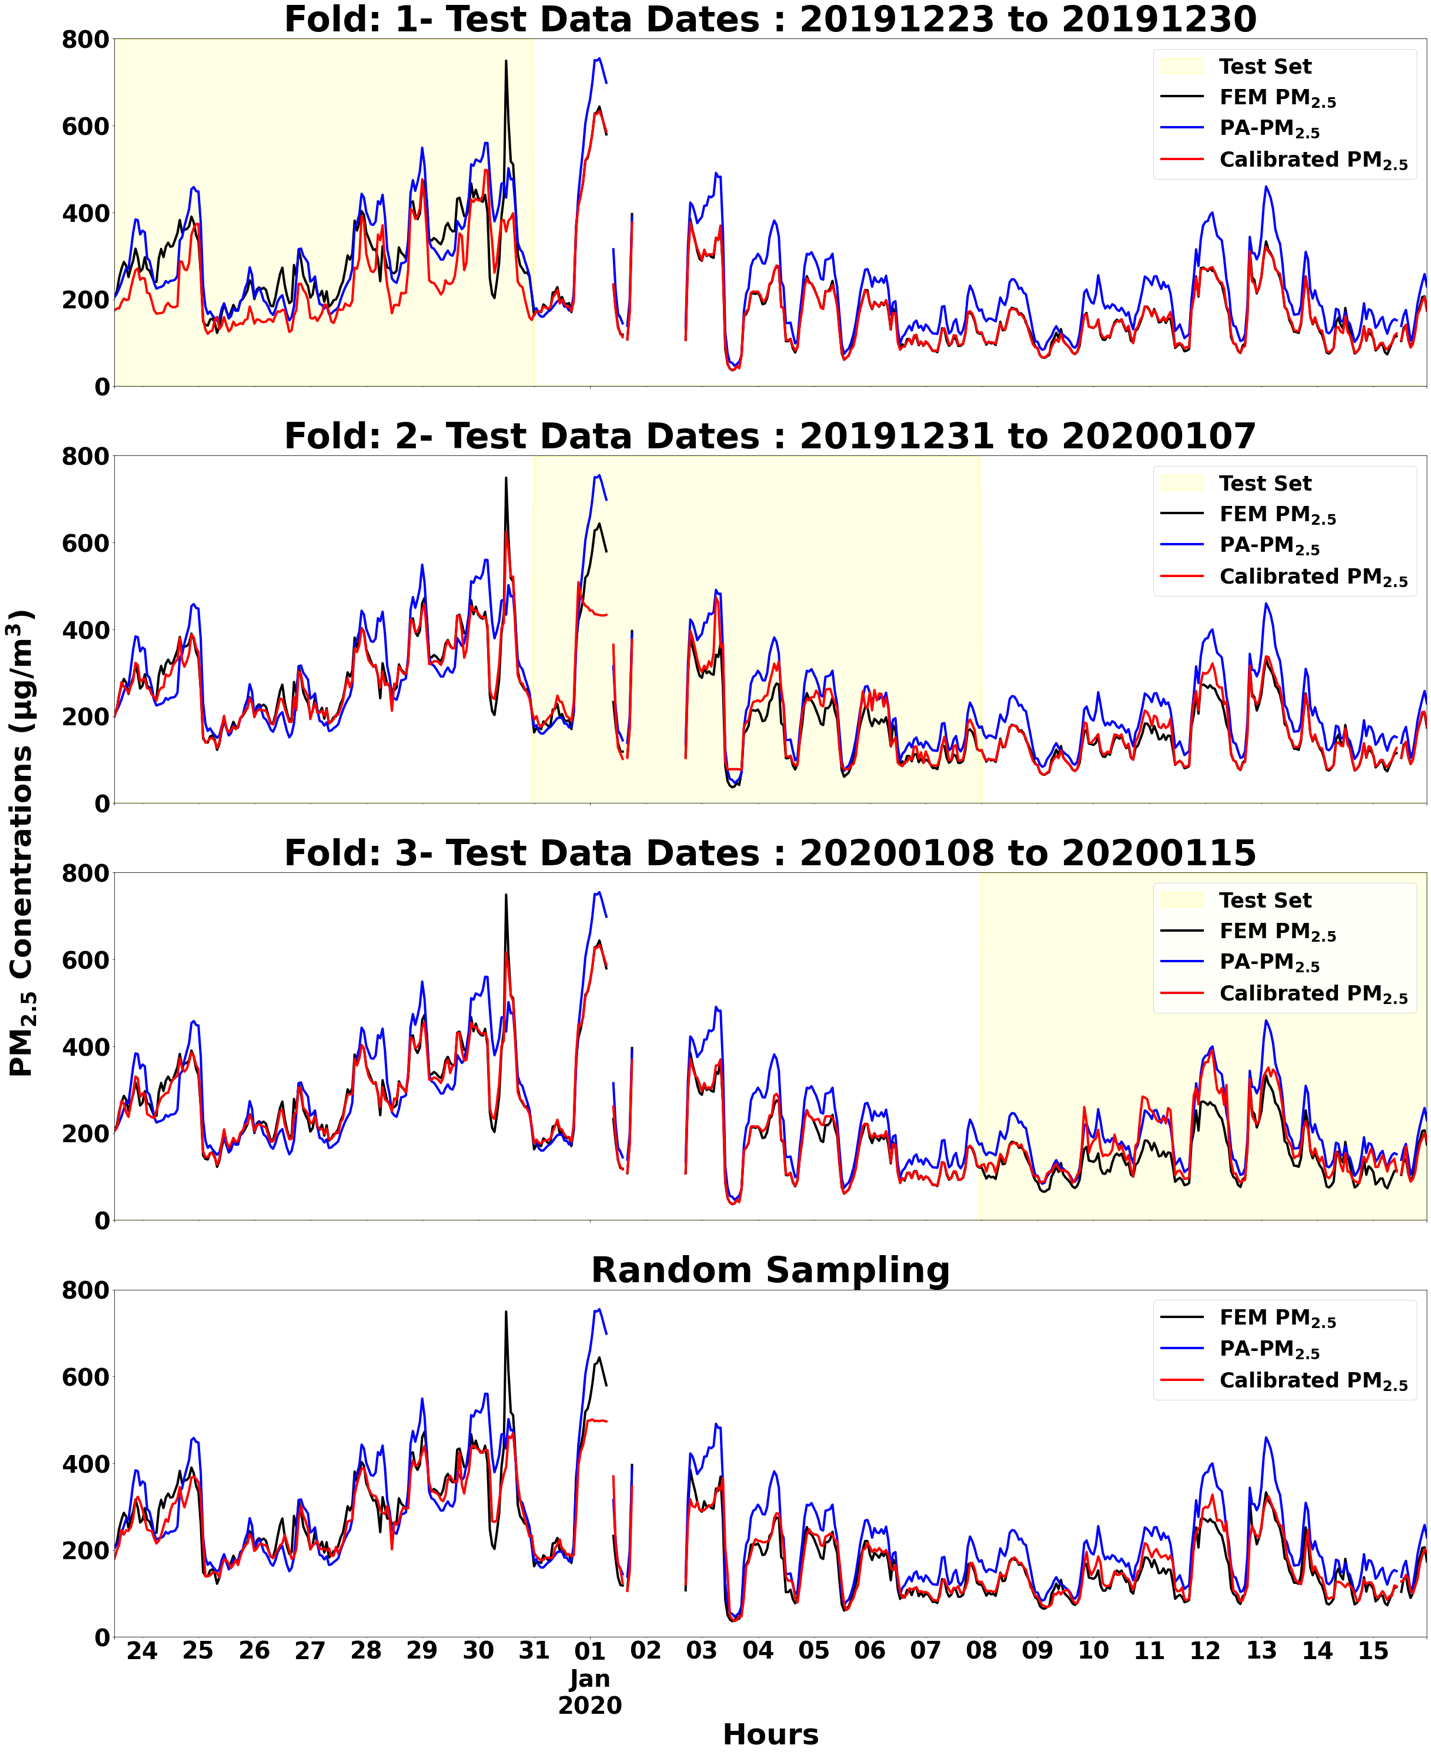
**

**Figure S3.5 –** We used a timeseries approach to train and validate a calibration model for India. The top three panels show the results of three different training and testing periods. In the first case, the model was trained on data from the last two weeks and tested on the first week of data. The results showed a large difference between the calibrated and FEM data. In the second case, the model was trained on data from the first and last weeks of data, and tested on the middle week. The difference between the calibrated and FEM data was smaller in this case. In the third case, the first two weeks were used for training and the last week for testing. The results were similar to the previous two cases. In the final attempt, a random sampling approach was used with 10-fold cross validation (S3.1-3.4). The results were much more consistent across the time period, with the calibrated data closely matching the FEM data.

**
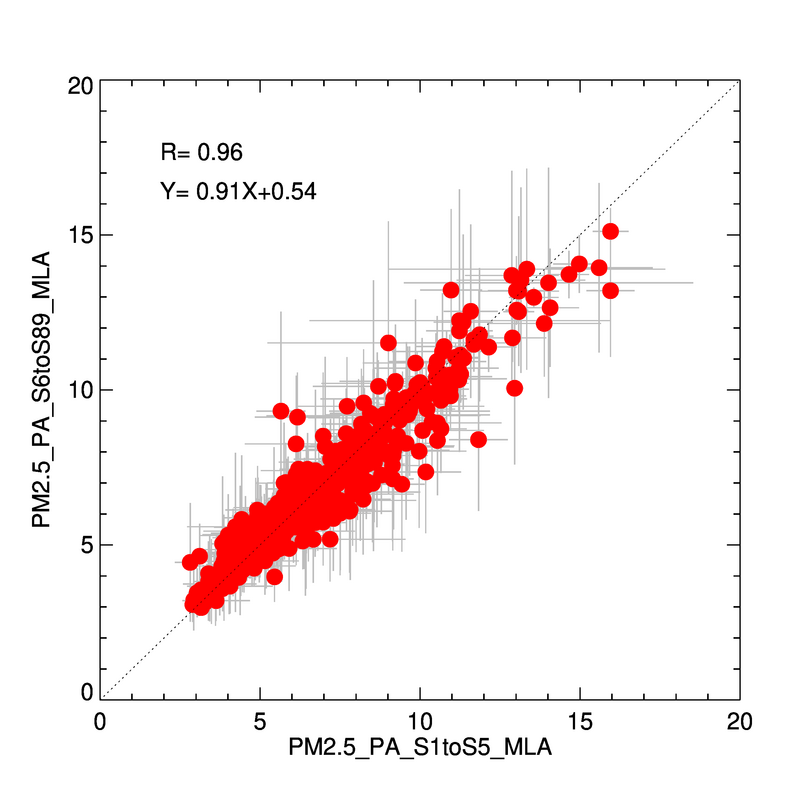
**

**Figure S4. Inter-comparison between PM2.5 values from 5 sensors (x-axis) used for ML development, and the remaining 84 sensors at Raleigh. The same ML calibration is applied for both sets of sensors during their collocated measurement period. The red dots are mean, and grey lines are one standard deviation among sensors in each set. The PM2.5 unit is μgm-3.**

**
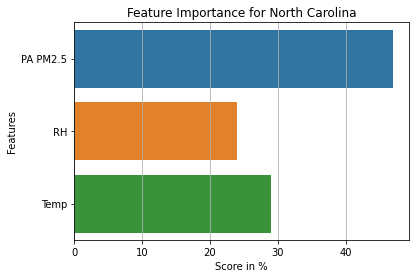
**

**
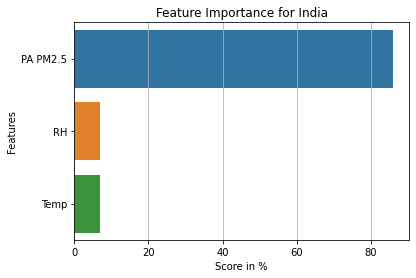
**

**Figure S5. The input feature importance for RF model for Raleigh (top) and Delhi (bottom)**

**Table S1. The mean bias (MB), mean percentage bias (MB%), and mean percentage absolute bias (|MB%| for hourly and daily averages. The biases before and after corrections are provided.**

| **Delhi** | **Hourly** |  | **MB** | **MB%** | **|MB%|** |
| --- | --- | --- | --- | --- | --- |
| **Raw Data** | **35.1** | **23.8** | **28.9** |
| **Corrected Data** | **0.22** | **2.0** | **9.1** |
| **Daily** | **Raw Data** | **37.3** | **23.7** | **25.3** |
| **Corrected Data** | **1.3** | **1.8** | **5.4** |
| **Raleigh** | **Hourly** | **Raw Data** | **-0.8** | **-4.9** | **604** |
| **Corrected Data** | **0.02** | **4.1** | **10.9** |
| **Daily** | **Raw Data** | **-0.8** | **-11.2** | **27.7** |
| **Corrected Data** | **0.03** | **2.2** | **5.0** |
